# Supplementary material
Source: PubMed Central journal article supplement (PMC4578005)

## SUPPLEMENTARY DATA

Table S1. Primers used for real-time PCR study (Vishwakarma *et al.*, 2014).

| Gene name     | Accession no. | Primer sequence (5' > 3')    | Amplicon length (bp) |
|---------------|---------------|------------------------------|----------------------|
| <i>UBQ5</i>   | AT3G62250     | F CCAAGCCGAAGAAGATCAAG       | 149                  |
|               |               | R ATGACTCGCCATGAAAGTCC       |                      |
| <i>CSD1</i>   | AT1G08830     | F TGAACTCAGCCTGGCTACTGG      | 164                  |
|               |               | R AGCCACACACCAGAAGATACACAC   |                      |
| <i>CAT1</i>   | AT1G20630     | F TGGGATTCAGACAGGCAAGAACG    | 162                  |
|               |               | R GTTTGGCCTCACGTTAAGACGAGT   |                      |
| <i>sAPX</i>   | AT4G08390     | F CCTCCGGAGGGTATCGTTATCTA    | 162                  |
|               |               | R ACAGCCAGAAACATTGTCCAAAAGG  |                      |
| <i>ChlMDH</i> | AT5G58330     | F ACCTCACTGGAGAGGGCATTG      | 135                  |
|               |               | R AATGTGGCTGTGCTCTGTACAGC    |                      |
| <i>MMDH1</i>  | AT1G53240     | F TTGCCTCGAAGGTGAGGTTGG      | 204                  |
|               |               | R GAGGTGGCAACTCTAGCTGGA      |                      |
| <i>ICDH</i>   | AT1G54340     | F TGATCCACGGAGCCAAGGTTAG     | 221                  |
|               |               | R CATGCAATAGCCCCTTTTCAGGCT   |                      |
| <i>COX15</i>  | AT5G56090     | F AGTGGTTTAGAGGGCCACCG       | 146                  |
|               |               | R TCAGCTGGTGGTTCAGGCAT       |                      |
| <i>AOX1a</i>  | AT3G22370     | F CTTCAGAGGAGATATGGATGTCGA   | 165                  |
|               |               | R TGCATTCTCTCATTCTCTGCTTCCTC |                      |
| <i>PFK4</i>   | AT5G61580     | F GAGCAATACCGAGTAACGCATCAG   | 156                  |
|               |               | R TTGTCACTTCCGTCACCTGAG      |                      |

Figure S1. Measurement of total content of ATP (A), ADP (B) and their corresponding ratio (C) in WT (black bars) and *aox1a* (grey bars) from control (Tween-20) and treated (20  $\mu\text{M}$  AA in Tween-20) leaf discs pre-illuminated (6 h) at a PPFD of 50  $\mu\text{moles m}^{-2} \text{s}^{-1}$  at 25  $^{\circ}\text{C}$ .

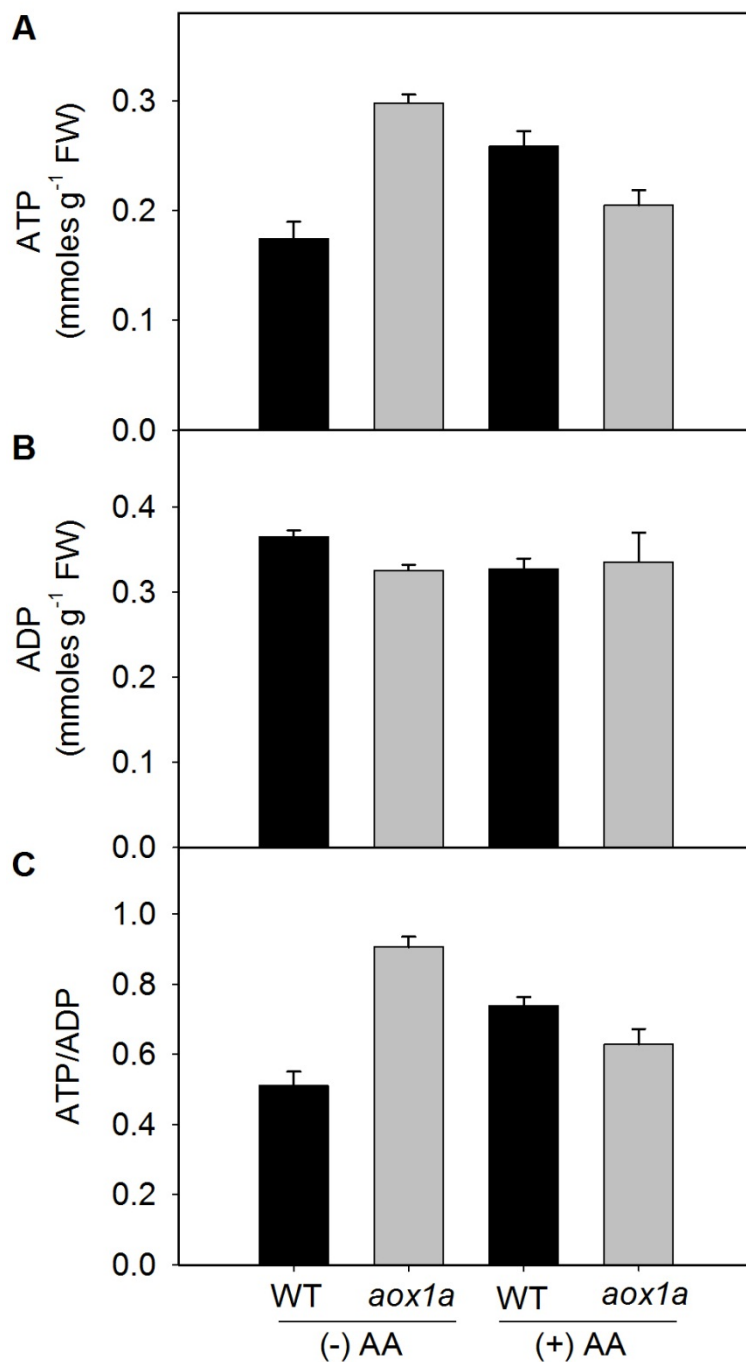

Supplement: supp_mcv122_aob-15070-s01.pdf [file supp_mcv122_aob-15070-s01.pdf]
